# Supplementary material for: Uptake, translocation, and transformation of metal-based nanoparticles in plants: recent advances and methodological challenges
Source: Royal Society of Chemistry journal article supplement (doi:10.1039/c8en00645h), 2018-10-31
Supplement: c8en00645h1.pdf [file c8en00645h1.pdf]

**Uptake, Translocation, and Transformation of Metal-based Nanoparticles in  
Plants: Recent Advances and Methodological Challenges**

Jitao Lv<sup>a</sup>, Peter Christie<sup>a</sup>, Shuzhen Zhang<sup>a, b\*</sup>

<sup>a</sup> *State Key Laboratory of Environmental Chemistry and Ecotoxicology, Research Center for Eco-Environmental Sciences, Chinese Academy of Sciences, Beijing 100085, China*

<sup>b</sup> *University of the Chinese Academy of Sciences, Beijing, 100049, China*

**List of Acronyms:**

Light microscope (LM), Fluorescence microscope (FM), Confocal laser scanning microscopy (CLSM), Scanning electron microscopy (SEM), (high resolution) transmission electron microscopy ((HR)TEM), Energy dispersive spectrum (EDS), Scan transmission electron microscopy (STEM), Inductively coupled plasma optical emission spectrometer (ICP-OES), Inductively coupled plasma mass spectrometry (ICP-MS), Single-particle ICP-MS (SP-ICP-MS), Laser ablation ICP-MS (LA-ICP-MS), Multicollector ICP-MS (MC-ICP-MS), Micro-X-ray fluorescence microscopy ( $\mu$ -XRF), Micro-X-ray absorption near edge structure ( $\mu$ -XANES), Micro-proton induced X-ray emission ( $\mu$ -PIXE), X-ray absorption spectroscopy (XAS), Scan transmission X-ray microscopy (STXM), Synchrotron Fourier transform infrared microspectroscopy (SR-FTIR), X-ray computed nanotomography (nano-CT), Nano secondary ion mass spectrometry (nano-SIMS), Confocal Raman mapping (CRM), Hyperspectral microscopy (HSI)

**Table S1** Literature summary of Ag NPs and Au NPs uptake and translocation, transformation in plants

| NPs                   | Plants                                       | Size/nm    | Exposure concentration | Exposure media and time | Analytical methods                    | Uptake and translocation, transformation <sup>ref</sup>                                                                                                                                                                                         |
|-----------------------|----------------------------------------------|------------|------------------------|-------------------------|---------------------------------------|-------------------------------------------------------------------------------------------------------------------------------------------------------------------------------------------------------------------------------------------------|
| GA-Ag                 | Ryegrass                                     | 6, 25      | 1- 40 mg/L             | Hydroponic, 5-7d        | LM, ICP-OES, $\mu$ -XRF, $\mu$ -XANES | AgNPs adsorb to plant root surfaces, that oxidative dissolution leads to the insertion of Ag across the cell membrane, and that once internalized Ag can be translocated between tissues. Silver is oxidized within plant tissues. <sup>1</sup> |
| PVP-Ag<br>GA-Ag       | <i>P. diversifolius</i> ,<br><i>E. densa</i> | 12, 50     |                        | Microcosm,<br>90d       | AF4-ICP-MS, XANES                     | In the presence of plant, 25% of the Ag present as an oxidized form resembling Ag-cysteine. <sup>2</sup>                                                                                                                                        |
| Bare Ag               | Wheat                                        | 10         | 0-5 mg/kg              | Sand, 14d               | TEM                                   | Ag NPs were observed in shoots of plants. <sup>3</sup>                                                                                                                                                                                          |
| Ag                    | Arabidopsis                                  | 20, 40, 80 | 67-535 mg/L            | Hydroponic,<br>28d      | TEM, STEM, CLSM                       | AgNPs accumulated in: border cells, root cap, columella and columella initials. NPs were apoplastically transported in the cell wall and found in plasmodesmata. <sup>4</sup>                                                                   |
| PEG-Ag<br>C-Ag        | Poplars,<br>Arabidopsis                      | 5, 10, 25  | 0.1-100 mg/L           | Hydroponic,<br>42d      | ICP-MS                                | Arabidopsis accumulated silver primarily in leaves, whereas poplars accumulated silver at similar concentrations in leaves and stems. <sup>5</sup>                                                                                              |
| Ag <sub>2</sub> S     | Cucumber, wheat                              | 20-25      | 10 mg/L                | Hydroponic,<br>7d       | SP-ICP-MS, XANES, $\mu$ -XRF          | Plants take up Ag <sub>2</sub> S NPs without a marked selectivity in regard to particle size and without substantial transformation during translocation from roots to shoots. <sup>6</sup>                                                     |
| (-, +) Au             | Arabidopsis                                  | 12         | 10 mg/L                | Agar, 10d               | Nano-CT, HSI                          | (-) NPs were able to translocate into the apoplast, (+) NPs produced higher mucilage which prevented NPs translocation into the root tissue. <sup>7</sup>                                                                                       |
| CA-, CYS-,<br>TGA- Au | Rice, tomato                                 | 8-12       | 500 ug/L               | Hydroponic,<br>1d       | ICP-MS, HRTEM                         | Negatively charged CYS-AuNPs were more efficiently absorbed in roots and transferred to shoots. CYS ligand probably facilitated the endocytosis of AuNPs and increased the internalization of NPs in plants. <sup>8</sup>                       |
| Au                    | Arabidopsis, alfalfa                         | 7-108      | 25-100 mg/L            | Agar, 8d                | TEM                                   | 5-100 nm NPs are not directly accumulated by plants. Au NPs were only observed in plants exposed to ionic gold in solution. <sup>9</sup>                                                                                                        |

**Table S1** Literature summary of Ag NPs and Au NPs uptake and translocation, transformation in plants (Continued)

| NPs          | Plants                                                             | Size/nm    | Exposure concentration | Exposure media and time | Analytical methods                           | Uptake and translocation, transformation <sup>ref</sup>                                                                                                                                                                                                                    |
|--------------|--------------------------------------------------------------------|------------|------------------------|-------------------------|----------------------------------------------|----------------------------------------------------------------------------------------------------------------------------------------------------------------------------------------------------------------------------------------------------------------------------|
| Au           | <i>A. caroliniana</i><br><i>M. simulans</i><br><i>Egeria densa</i> | 4, 18      | 250 mg/L               | Hydroponic,<br>1d       | TEM, SEM, STEM                               | Absorption of AuNPs through root uptake was size and species dependent. 4-nm and 18-nm AuNPs were absorbed by <i>A. caroliniana</i> , whereas only 4-nm AuNPs were absorbed by <i>M. simulans</i> . <i>Egeria densa</i> did not absorb AuNPs of either size. <sup>10</sup> |
| T-Au<br>C-Au | Tomato, wheat                                                      | 10, 30, 50 | 30 mg/L                | Hydroponic,<br>3-7d     | LA-ICP-MS, $\mu$ -XRF                        | All AuNPs were bioaccumulated in tobacco, but no bioaccumulation of AuNPs was observed for any treatment in wheat. <sup>11</sup>                                                                                                                                           |
| C-Au         | Tomato                                                             | 3.5, 18    | 48, 76 mg/L            | Hydroponic,<br>12d      | SEM, HRTEM, EDS,<br>$\mu$ -XANES, $\mu$ -XRF | Au NPs entered plants through the roots and moved into the vasculature. The uptake was size selective, 3.5 nm NPs were detected in plants but 18 nm NPs not. <sup>12</sup>                                                                                                 |
| (+,0,-) Au   | Rice                                                               | 2          | 1.6,<br>0.14 mg/L      | Hydroponic,<br>5d, 90d  | LA-ICP-MS                                    | Surface charge greatly affected the AuNP uptake into plant tissues. (+) AuNPs preferential accumulated in roots but (-) AuNPs were preferential to translocation from roots to shoots. <sup>13</sup>                                                                       |
| PVP-Au       | Tomato                                                             | 40         | 0.2, 5 mg/L            | Hydroponic, 4d          | SP-ICP-MS                                    | Tomato can uptake AuNPs as intact particles without alternating the AuNP properties. <sup>14</sup>                                                                                                                                                                         |
| Bare Au      | Poplar                                                             | 15, 25, 50 | 250-500 $\mu$ g/L      | Hydroponic, 6d          | ICP-MS, TEM                                  | AuNPs were observed in the cytoplasm and various organelles of root and leaf cells. <sup>15</sup>                                                                                                                                                                          |

**Table S2** Literature summary of metallic oxide NPs uptake and translocation, transformation in plants

| NPs                  | Plant              | Size/nm | Exposure concentration | Exposure media and time | Analytical methods            | Uptake and translocation, transformation <sup>ref</sup>                                                                                                                                                                                                                                                                               |
|----------------------|--------------------|---------|------------------------|-------------------------|-------------------------------|---------------------------------------------------------------------------------------------------------------------------------------------------------------------------------------------------------------------------------------------------------------------------------------------------------------------------------------|
| ARS-TiO <sub>2</sub> | Arabidopsis        | 2.8     | 1 μM                   | Hydroponic, 24h         | FM, μ-XRF                     | TiO <sub>2</sub> NPs capable of passing the cell walls of plant cells, and capable of penetrating deeper into the plant tissues, beyond the surface cell layers. <sup>16</sup>                                                                                                                                                        |
| TiO <sub>2</sub>     | Wheat, Arabidopsis | 12      | 100 mg/L               | Hydroponic, 7d          | SEM, μ-XRF, XANES             | TiO <sub>2</sub> NPs were transferred from the exposure suspension to vegetal tissues. Ti is still in the TiO <sub>2</sub> chemical form inside plants. <sup>17</sup>                                                                                                                                                                 |
| TiO <sub>2</sub>     | Wheat              | 20      | 4307.5 mg/kg           | Soil, 6m                | SEM, TEM                      | TiO <sub>2</sub> NPs were retained in the soil for long periods and primarily adhered to root cell walls.                                                                                                                                                                                                                             |
| ZnO                  | Wheat              | 40      | 214.5 mg/kg            | Soil, 6m                | SEM, TEM                      | ZnO NPs dissolved in the soil, thereby enhancing the uptake of toxic Zn by wheat. <sup>18</sup>                                                                                                                                                                                                                                       |
| TiO <sub>2</sub>     | Cucumber           | 27      | 100-4000 mg/L          | Hydroponic, 15d         | μ-XRF, μ-XANES                | TiO <sub>2</sub> NPs were not biotransformed inside plant, and were transported from the roots to the leaf trichomes. <sup>19</sup>                                                                                                                                                                                                   |
| TiO <sub>2</sub>     | Rice               | 19-37   | 5, 50 mg/L             | Hydroponic, 3d          | STEM-EDS, SP-ICP-MS, ICP-OES  | TiO <sub>2</sub> NPs penetrated into the plant root and resulted in Ti accumulation in above ground tissues. <sup>20</sup>                                                                                                                                                                                                            |
| TiO <sub>2</sub>     | Wheat              | 14-655  | 100 mg/L               | Hydroponic, 7d          | μ-XRF, μ-XANES<br>μ-PIXE, TEM | Below 36 nm, NPs accumulate in roots and distribute through whole plant tissues without dissolution or transformation; 36-140 nm, NPs are accumulated in wheat root parenchyma but do not reach the stele and consequently do not translocate to the shoot; above 140 nm, NPs are no longer accumulated in wheat roots. <sup>21</sup> |
| ZnO                  | Ryegrass           | 20      | 10-1000 mg/L           | Hydroponic, 12d         | SEM, TEM, ICP-MS              | ZnO NPs were observed present in apoplast and protoplast of the root endodermis and stele. Little (if any) ZnO nanoparticles could translocate up in the ryegrass in this study. <sup>22</sup>                                                                                                                                        |
| ZnO                  | Maize              | 30      | 0-100 mg/L             | Hydroponic, 7d          | ICP-OES, TEM, FM, μ-XRF, XAS  | ZnO NPs were observed in the cortex, root tip cells, vascular, and primary root-lateral root junction. No ZnO nanoparticle was observed to translocate to shoots. Zn accumulated in plant mainly as the form of Zn phosphate similar to Zn ion exposure. <sup>23</sup>                                                                |
| ZnO                  | Soybean            | 8       | 500-4000 mg/L          | Hydroponic, 5d          | XANES                         | CeO <sub>2</sub> NPs were presented in roots, whereas ZnO NPs were not present, Zn appeared coordinated in the same manner as Zn-nitrate or Zn-acetate. <sup>24</sup>                                                                                                                                                                 |
| CeO <sub>2</sub>     | Soybean            | 7       | 500-4000 mg/L          | Hydroponic, 5d          | XANES                         | CeO <sub>2</sub> NPs were presented in roots, whereas ZnO NPs were not present, Zn appeared coordinated in the same manner as Zn-nitrate or Zn-acetate. <sup>24</sup>                                                                                                                                                                 |
| ZnO                  | Phaseolus          | 40      | 100, 1000 mg/L         | Hydroponic, 2d          | μ-XRF, XANES                  | Phaseolus takes up Zn bound to both citrate and malate, while entire NPs were only absorbed when roots were injured. <sup>25</sup>                                                                                                                                                                                                    |

**Table S2** Literature summary of metallic oxide NPs uptake and translocation, transformation in plants (Continued)

| NPs                                      | Plant                 | Size/nm     | Exposure concentration  | Exposure media and time | Analytical methods                    | Uptake and translocation, transformation                                                                                                                                                                                                                        |
|------------------------------------------|-----------------------|-------------|-------------------------|-------------------------|---------------------------------------|-----------------------------------------------------------------------------------------------------------------------------------------------------------------------------------------------------------------------------------------------------------------|
| ZnO                                      | Velvet mesquite       | 10          | 500-4000 mg/L           | Hydroponic, 15d         | ICP-OES, XRF, XANES                   | $\mu$ - ZnO NPs were not present in mesquite tissues, Zn was found resemble to the spectra of Zn(NO <sub>3</sub> ) <sub>2</sub> . Zn was presented in the vascular system of roots and leaves in ZnO NP treated plants. <sup>26,27</sup>                        |
| ZnO                                      | Maize                 | --          | 100-800 mg/kg           | Soil, 30d               | ICP-OES, CLSM                         | ZnO NPs aggregates penetrated the root epidermis and cortex through the apoplastic pathway and passed the endodermis through the symplastic pathway. <sup>28</sup>                                                                                              |
| ZnO, CeO <sub>2</sub>                    | Soybean               | 10<br>8     | 500 mg/kg<br>1000 mg/kg | Soil, 48d               | ICP-MS, $\mu$ -XRF, XANES             | $\mu$ - No presence of ZnO NPs within plant tissues, Zn presented in plant in a form resembling Zn-citrat. Ce remained mostly as CeO <sub>2</sub> NPs within the plant, a small percentage of CeO <sub>2</sub> NPs was biotransformed to Ce(III). <sup>29</sup> |
| ZnO                                      | Cowpea                | 20-30       | 500 mg/kg               | Soil, 28d               | $\mu$ -XRF, XAFS                      | No upward translocation of ZnO NPs from roots to shoots was observed. Zn were similar in stem and leaf tissues regardless of Zn-treatments, with Zn mainly bound to citrate, histidine, and phytate. <sup>30</sup>                                              |
| CuO                                      | Maize                 | 20-40       | 100 mg L/1              | Hydroponic, 15d         | ICP-MS, TEM, EDS                      | CuO NPs were transported from roots to shoots via xylem and could translocate from shoots back to roots via phloem. During this translocation, CuO NPs could be reduced from Cu (II) to Cu (I). <sup>31</sup>                                                   |
| CuO                                      | Rice                  | 40          | 100 mg/L                | Hydroponic, 14d         | $\mu$ -XRF, $\mu$ -XANES, XANES, STXM | CuO NPs were transported from the roots to the leaves, and that Cu (II) combined with cysteine, citrate, and phosphate ligands and was even reduced to Cu (I). <sup>32</sup>                                                                                    |
| CuO                                      | Elsholtzia splendens. | 43          | 100-1000 mg/L           | Hydroponic, 14d         | ICP-MS, HRTEM, EDS, XANES             | Accumulated Cu species existed predominantly as CuO NPs in the plant tissues. CuO NPs-like deposits were found in the root cells and leaf cells. <sup>33</sup>                                                                                                  |
| CuO<br>ZnO                               | Wheat                 | <50<br><100 | 500 mg/kg               | Sand, 14d               | ICP-MS, XANES                         | Bioaccumulation of Cu, mainly as CuO and Cu(I)-sulfur complexes, and Zn as Zn-phosphate was detected in the shoots of NP-challenged plants. <sup>34</sup>                                                                                                       |
| SiO <sub>2</sub>                         | Arabidopsis           | 14, 50, 200 | 250, 1000 mg/L          | Hydroponic, 21,42d      | TEM, ICP-OES                          | Significant uptake of SiO <sub>2</sub> NPs (14, 50, and 200 nm) into the root system of A. thaliana was observed, and the contents of uptake were size-dependent. <sup>35</sup>                                                                                 |
| Fe <sub>3</sub> O <sub>4</sub>           | Pumpkin               | 20          | 500mg/L                 | Hydroponic, 20d         | VSM                                   | Magnetite NPs can absorb, translocate, and accumulate the particles in the plant tissues. <sup>36</sup>                                                                                                                                                         |
| $\gamma$ -Fe <sub>2</sub> O <sub>3</sub> | Maize                 | 21          | 20-100mg/L              | Hydroponic, 14d         | TEM, CLSM                             | NPs could enter roots and migrate apoplastically from the epidermis to the endodermis and the vacuole. But most of NPs existed around the epidermis and did not transport from roots to shoots. <sup>37</sup>                                                   |

**Table S3** Literature summary of rare-earth oxides NPs uptake and translocation, transformation in plants

| NPs                             | Plant                            | Size/nm | Exposure concentration | Exposure media and time | Analytical methods               | Uptake and translocation, transformation                                                                                                                                                                                                                                                |
|---------------------------------|----------------------------------|---------|------------------------|-------------------------|----------------------------------|-----------------------------------------------------------------------------------------------------------------------------------------------------------------------------------------------------------------------------------------------------------------------------------------|
| CeO <sub>2</sub>                | Alfalfa, maize, cucumber, tomato | 7       | 500-4000 mg/L          | Hydroponic, 6-9d        | ICP-OES, XAS                     | CeO <sub>2</sub> were found within root tissues of the four plant species without transformation. <sup>38</sup>                                                                                                                                                                         |
| <sup>141</sup> CeO <sub>2</sub> | Cucumber                         | 7, 22   | 2-200 mg/L             | Hydroponic, 7d          | Autoradiography, TEM             | Only very limited amounts of CeO <sub>2</sub> NPs could be transferred from the roots to shoots. However, once they have entered into the vascular cylinder, NPs could move smoothly to the end of the vascular bundle along with water flow. <sup>39</sup>                             |
| CeO <sub>2</sub>                | Tomato                           | 20      | 0.1–10 mg/L            | Hydroponic, 70d         | ICP-MS                           | CeO <sub>2</sub> NPs were taken up by tomato roots and translocated to shoots and edible tissues. In particular, substantially higher Ce concentrations were detected in the fruits. <sup>40</sup>                                                                                      |
| CeO <sub>2</sub>                | Cucumber                         | 7       | 2000 mg/L              | Hydroponic, 21d         | ICP-MS, STXM, XANES, TEM, EDS    | CeO <sub>2</sub> NPs were likely dissolved and reducing to Ce(III) by root exudates. Ce(III) ions were precipitated on the root surfaces and in intercellular spaces with phosphate, or form complexes with carboxyl compounds during translocation to the shoots. <sup>41</sup>        |
| CeO <sub>2</sub>                | Cucumber                         | 25      | 20-2000 mg/L           | Hydroponic, 7d          | STXM, XANES, TEM, EDS            | Root surfaces are the sites, and the physicochemical interaction between the NPs and root exudates at the nanobio interface is the necessary condition for the transformation of CeO <sub>2</sub> NPs in plant systems. <sup>42</sup>                                                   |
| CeO <sub>2</sub>                | Cucumber                         | 25      | 200, 2000 mg/L         | Hydroponic, 3d          | ICP-MS, $\mu$ -XRF, $\mu$ -XANES | About 15% of Ce was reduced from Ce(IV) to Ce(III) in the roots. Ce was transported as a mixture of Ce(IV) and Ce(III) from roots to shoots through xylem, while it was transported almost only in the form of CeO <sub>2</sub> from shoots back to roots through phloem. <sup>43</sup> |
| (+,0,-)CeO <sub>2</sub>         | Wheat                            | 4nm     | 20 mg/L                | Hydroponic, 34h         | ICP-MS, $\mu$ -XRF, XANES        | A 15–20% reduction from Ce(IV) to Ce(III) was observed in both roots and leaves, independent of NP surface charge. (+) CeO <sub>2</sub> NPs exposed plants had lower Ce leaf concentrations. <sup>44</sup>                                                                              |

**Table S3** Literature summary of rare-earth oxides NPs uptake and translocation, transformation in plants (Continued)

| NPs                            | Plant               | Size/nm | Exposure concentration | Exposure and time | media | Analytical methods             | Uptake and translocation, transformation                                                                                                                                                                               |
|--------------------------------|---------------------|---------|------------------------|-------------------|-------|--------------------------------|------------------------------------------------------------------------------------------------------------------------------------------------------------------------------------------------------------------------|
| CeO <sub>2</sub>               | Tall fescue, tomato | 3.9     | 1-50 mg/kg             | Soil, 8d          |       | XANES                          | Soil properties controlled Ce uptake. The clay fraction enhanced the retention of the CeO <sub>2</sub> nanoparticles and hence reduced Ce uptake, whereas the organic matter content enhanced Ce uptake. <sup>45</sup> |
| Yb <sub>2</sub> O <sub>3</sub> | Cucumber            | 15      | 0.32-2000 mg/L         | Hydroponic, 14d   |       | ICP-MS, TEM, EDS, STXM, NEXAFS | In the intercellular regions of the roots, Yb <sub>2</sub> O <sub>3</sub> NPs and YbCl <sub>3</sub> were all transformed to YbPO <sub>4</sub> . <sup>46</sup>                                                          |
| La <sub>2</sub> O <sub>3</sub> | Cucumber            | 22      | 2-2000 mg/L            | Hydroponic, 5d    |       | TEM, EDS, STXM                 | La <sub>2</sub> O <sub>3</sub> NPs and LaCl <sub>3</sub> were both transformed to needle-like LaPO <sub>4</sub> nanoclusters in the intercellular regions of the cucumber roots. <sup>47</sup>                         |



## References

- 1 L. Y. Yin, Y. W. Cheng, B. Espinasse, B. P. Colman, M. Auffan, M. Wiesner, J. Rose, J. Liu and E. S. Bernhardt, *Environ. Sci. Technol.*, 2011, **45**, 2360-2367.
- 2 A. J. Bone, B. P. Colman, A. P. Gondikas, K. M. Newton, K. H. Harrold, R. M. Cory, J. M. Unrine, S. J. Klaine, C. W. Matson and R. T. Di Giulio, *Environ. Sci. Technol.*, 2012, **46**, 6925-6933.
- 3 C. O. Dimkpa, J. E. McLean, N. Martineau, D. W. Britt, R. Haverkamp and A. J. Anderson, *Environ. Sci. Technol.*, 2013, **47**, 1082-1090.
- 4 J. Geisler-Lee, Q. Wang, Y. Yao, W. Zhang, M. Geisler, K. Li, Y. Huang, Y. Chen, A. Kolmakov and X. Ma, *Nanotoxicology*, 2013, **7**, 323-337.
- 5 J. Wang, Y. Koo, A. Alexander, Y. Yang, S. Westerhof, Q. B. Zhang, J. L. Schnoor, V. L. Colvin, J. Braam and P. J. J. Alvarez, *Environ. Sci. Technol.*, 2013, **47**, 5442-5449.
- 6 P. Wang, E. Lombi, S. K. Sun, K. G. Scheckel, A. Malysheva, B. A. McKenna, N. W. Menzies, F. J. Zhao and P. M. Kopittke, *Environ.-Sci. Nano*, 2017, **4**, 448-460.
- 7 A. Avellan, F. Schwab, A. Masion, P. Chaurand, D. Borschneck, V. Vidal, J. Rose, C. Santaella and C. Levard, *Environ. Sci. Technol.*, 2017, **51**, 8682-8691.
- 8 H. Li, X. Ye, X. Guo, Z. Geng and G. Wang, *J Hazard Mater*, 2016, **314**, 188-196.
- 9 A. F. Taylor, E. L. Rylott, C. W. Anderson and N. C. Bruce, *PLoS One*, 2014, **9**, e93793.
- 10 J. B. Glenn, S. A. White and S. J. Klaine, *Environ. Toxicol. Chem.*, 2012, **31**,

194-201.

- 11 J. D. Judy, J. M. Unrine, W. Rao, S. Wirick and P. M. Bertsch, *Environ. Sci. Technol.*, 2012, **46**, 8467-8474.
- 12 T. Sabo-Attwood, J. M. Unrine, J. W. Stone, C. J. Murphy, S. Ghoshroy, D. Blom, P. M. Bertsch and L. A. Newman, *Nanotoxicology*, 2012, **6**, 353-360.
- 13 J. Koelmel, T. Leland, H. H. Wang, D. Amarasiriwardena and B. S. Xing, *Environ. Pollut.*, 2013, **174**, 222-228.
- 14 Y. B. Dan, W. L. Zhang, R. M. Xue, X. M. Ma, C. Stephan and H. L. Shi, *Environ. Sci. Technol.*, 2015, **49**, 3007-3014.
- 15 G. S. Zhai, K. S. Walters, D. W. Peate, P. J. J. Alvarez and J. L. Schnoor, *Environ. Sci. Tech. Let.*, 2014, **1**, 146-151.
- 16 J. Kurepa, T. Paunesku, S. Vogt, H. Arora, B. M. Rabatic, J. J. Lu, M. B. Wanzer, G. E. Woloschak and J. A. Smalle, *Nano Lett.*, 2010, **10**, 2296-2302.
- 17 C Larue, H Khodja, N Herlin-Boime, F Brisset, AM Flank, B Fayard, S Chaillou and M. Carrière, *J. Phy. Conf. Ser.*, 2011, **304**.
- 18 W. C. Du, Y. Y. Sun, R. Ji, J. G. Zhu, J. C. Wu and H. Y. Guo, *J. Environ. Monitor.*, 2011, **13**, 822-828.
- 19 A. D. Servin, H. Castillo-Michel, J. A. Hernandez-Viezcas, B. C. Diaz, J. R. Peralta-Videa and J. L. Gardea-Torresdey, *Environ. Sci. Technol.*, 2012, **46**, 7637-7643.
- 20 Y. Deng, E. J. Petersen, K. E. Challis, S. A. Rabb, R. D. Holbrook, J. F. Ranville, B. C. Nelson and B. Xing, *Environ. Sci. Technol.*, 2017, **51**, 10615-10623.

- 21 C. Larue, J. Laurette, N. Herlin-Boime, H. Khodja, B. Fayard, A. M. Flank, F. Brisset and M. Carriere, *Sci . Total. Environ.*, 2012, **431**, 197-208.
- 22 D. H. Lin and B. S. Xing, *Environ. Sci. Technol.*, 2008, **42**, 5580-5585.
- 23 J. T. Lv, S. Z. Zhang, L. Luo, J. Zhang, K. Yang and P. Christie, *Environ.-Sci. Nano*, 2015, **2**, 68-77.
- 24 M. L. Lopez-Moreno, G. de la Rosa, J. A. Hernandez-Viezcas, H. Castillo-Michel, C. E. Botez, J. R. Peralta-Videa and J. L. Gardea-Torresdey, *Environ. Sci. Technol.*, 2010, **44**, 7315-7320.
- 25 T. N. M. da Cruz, S. M. Savassa, M. H. F. Gomes, E. S. Rodrigues, N. M. Duran, E. de Almeida, A. P. Martinelli and H. W. P. de Carvalho, *Environ.-Sci. Nano*, 2017, **4**, 2367-2376.
- 26 J. A. Hernandez-Viezcas, H. Castillo-Michel, A. D. Servin, J. R. Peralta-Videa and J. L. Gardea-Torresdey, *Chem. Eng. J.*, 2011, **170**, 346-352.
- 27 M. Kumari, S. S. Khan, S. Pakrashi, A. Mukherjee and N. Chandrasekaran, *J. Hazard Mater.*, 2011, **190**, 613-621.
- 28 L. J. Zhao, J. R. Peralta-Videa, M. H. Ren, A. Varela-Ramirez, C. Q. Li, J. A. Hernandez-Viezcas, R. J. Aguilera and J. L. Gardea-Torresdey, *Chem. Eng. J.*, 2012, **184**, 1-8.
- 29 J. A. Hernandez-Viezcas, H. Castillo-Michel, J. C. Andrews, M. Cotte, C. Rico, J. R. Peralta-Videa, Y. Ge, J. H. Priester, P. A. Holden and J. L. Gardea-Torresdey, *ACS Nano*, 2013, **7**, 1415-1423.
- 30 P. Wang, N. W. Menzies, E. Lombi, B. A. McKenna, B. Johannessen, C. J.

- Glover, P. Kappen and P. M. Kopittke, *Environ. Sci. Technol.*, 2013, **47**, 13822-13830.
- 31 Z. Wang, X. Xie, J. Zhao, X. Liu, W. Feng, J. C. White and B. Xing, *Environ. Sci. Technol.*, 2012, **46**, 4434-4441.
- 32 C. Peng, D. Duan, C. Xu, Y. Chen, L. Sun, H. Zhang, X. Yuan, L. Zheng, Y. Yang, J. Yang, X. Zhen, Y. Chen and J. Shi, *Environ. Pollut.*, 2015, **197**, 99-107.
- 33 C. Peng, C. Xu, Q. Liu, L. Sun, Y. Luo and J. Shi, *Environ. Sci. Technol.*, 2017, **51**, 4907-4917.
- 34 C. O. Dimkpa, J. E. McLean, D. E. Latta, E. Manangon, D. W. Britt, W. P. Johnson, M. I. Boyanov and A. J. Anderson, *J. Nanopart Res.*, 2012, **14**.
- 35 Danielle L. Slomberg and M. H. Schoenfisch, 2012.
- 36 H. Zhu, J. Han, J. Q. Xiao and Y. Jin, *J. Environ. Monitor.*, 2008, **10**, 713-717.
- 37 J. Li, J. Hu, C. Ma, Y. Wang, C. Wu, J. Huang and B. Xing, *Chemosphere*, 2016, **159**, 326-334.
- 38 M. L. Lopez-Moreno, G. de la Rosa, J. A. Hernandez-Viezcas, J. R. Peralta-Videa and J. L. Gardea-Torresdey, *J. Agr. Food Chem.*, 2010, **58**, 3689-3693.
- 39 Z. Y. Zhang, X. He, H. F. Zhang, Y. H. Ma, P. Zhang, Y. Y. Ding and Y. L. Zhao, *Metallomics*, 2011, **3**, 816-822.
- 40 Q. Wang, X. M. Ma, W. Zhang, H. C. Pei and Y. S. Chen, *Metallomics*, 2012, **4**, 1105-1112.
- 41 P. Zhang, Y. H. Ma, Z. Y. Zhang, X. He, J. Zhang, Z. Guo, R. Z. Tai, Y. L. Zhao

- and Z. F. Chai, *ACS Nano*, 2012, **6**, 9943-9950.
- 42 Y. H. Ma, P. Zhang, Z. Y. Zhang, X. He, J. Z. Zhang, Y. Y. Ding, J. Zhang, L. R. Zheng, Z. Guo, L. J. Zhang, Z. F. Chai and Y. L. Zhao, *Environ. Sci. Technol.*, 2015, **49**, 10667-10674.
- 43 Y. Ma, X. He, P. Zhang, Z. Zhang, Y. Ding, J. Zhang, G. Wang, C. Xie, W. Luo, J. Zhang, L. Zheng, Z. Chai and K. Yang, *Environ. Sci. Technol.*, 2017, **51**, 5215-5221.
- 44 E. Spielman-Sun, E. Lombi, E. Donner, D. Howard, J. M. Unrine and G. V. Lowry, *Environ. Sci. Technol.*, 2017, **51**, 7361-7368.
- 45 C. Layet, M. Auffan, C. Santaella, C. Chevassus-Rosset, M. Montes, P. Ortet, M. Barakat, B. Collin, S. Legros, M. N. Bravin, B. Angeletti, I. Kieffer, O. Proux, J. L. Hazemann and E. Doelsch, *Environ. Sci. Technol.*, 2017, **51**, 9756-9764.
- 46 P. Zhang, Y. H. Ma, Z. Y. Zhang, X. He, Z. Guo, R. Z. Tai, Y. Y. Ding, Y. L. Zhao and Z. F. Chai, *Environ. Sci. Technol.*, 2012, **46**, 1834-1841.
- 47 Y. H. Ma, X. He, P. Zhang, Z. Y. Zhang, Z. Guo, R. Z. Tai, Z. J. Xu, L. J. Zhang, Y. Y. Ding, Y. L. Zhao and Z. F. Chai, *Nanotoxicology*, 2011, **5**, 743-753.
